# Supplementary material for: Fabrication of nanoscale NiO/Ni heterostructures as electrocatalysts for efficient methanol oxidation
Source: Royal Society of Chemistry journal article supplement (doi:10.1039/c7ta01982c), 2017-01-01
Supplement: c7ta01982c1.pdf [file c7ta01982c1.pdf]

## Supporting Information

### Fabrication of Nanoscale Ni/NiO Heterostructures as Electrocatalyst for Efficient Methanol Oxidation

Juan Wang,<sup>a</sup> Detre Teschner,<sup>b</sup> Yuanying Yao,<sup>a</sup> Xing Huang,<sup>\* b</sup> Marc Willinger,<sup>b</sup>  
Lidong Shao,<sup>\* a</sup> and Robert Schlögl<sup>b</sup>

<sup>a</sup>Shanghai Key Laboratory of Materials Protection and Advanced Materials in Electric Power, Shanghai University of Electric Power, Shanghai 200090, China. E-mail: lidong.shao@shiep.edu.cn

<sup>b</sup>Department of Inorganic Chemistry, Fritz-Haber Institute of the Max Planck Society, Faradayweg 4-6, 14195 Berlin, Germany. E-mail: xinghuang@fhi-berlin.mpg.de

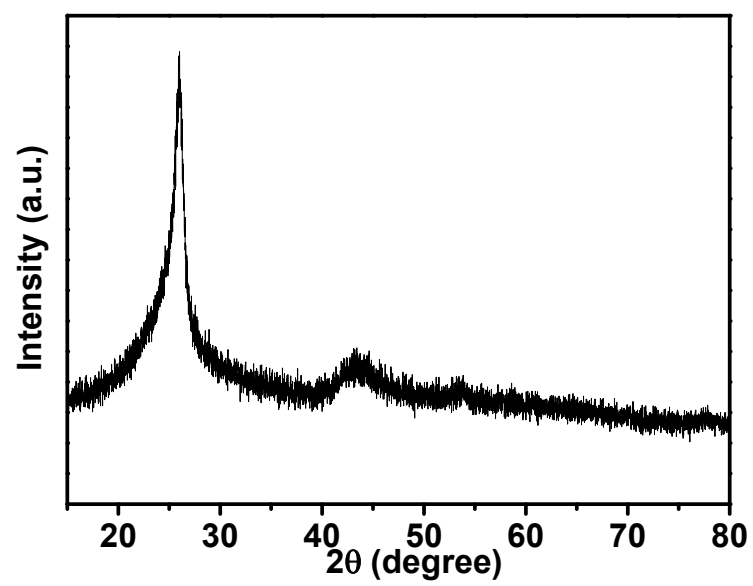

**Figure S1.** XRD pattern of OCNTs

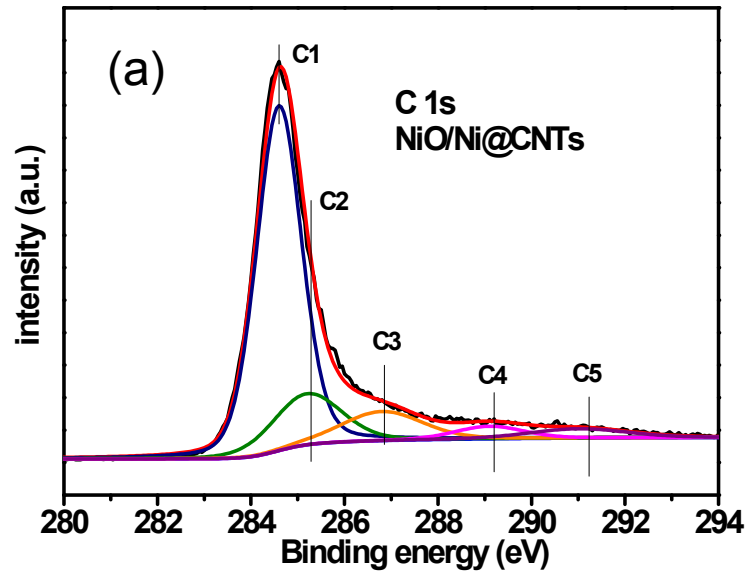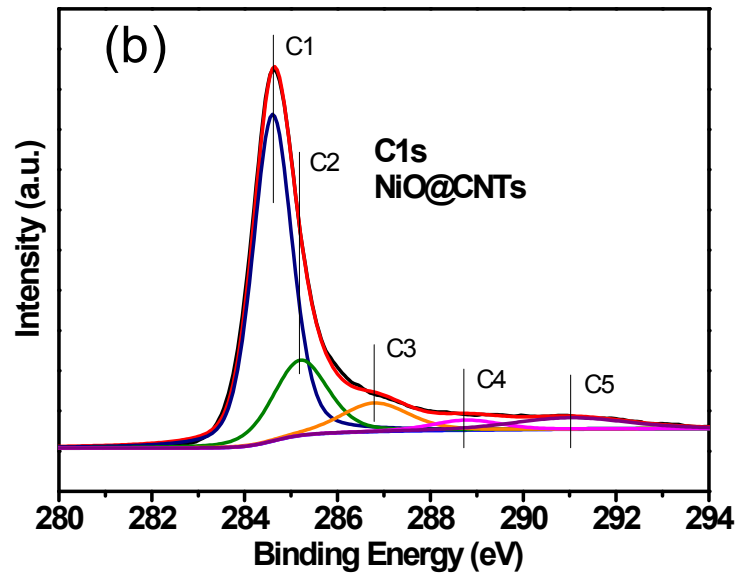

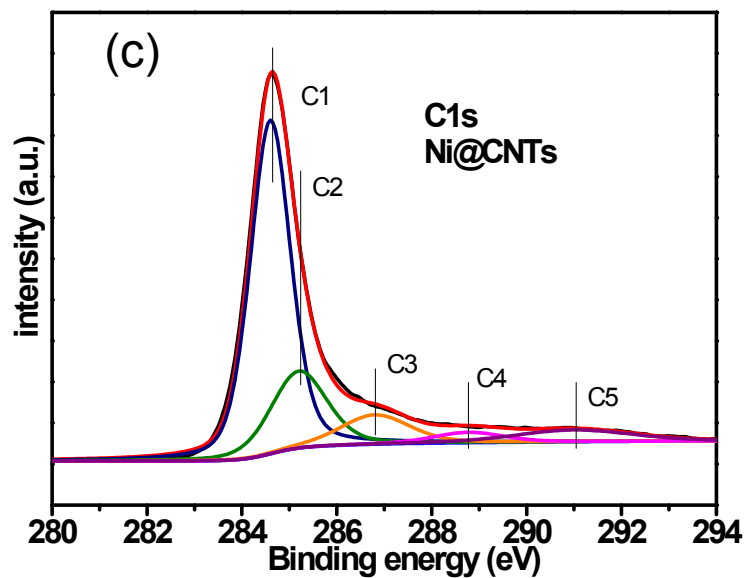

**Figure S2.** XPS C1s profile of NiO/Ni@CNTs (a), NiO@CNTs (b) and Ni@CNTs (c).

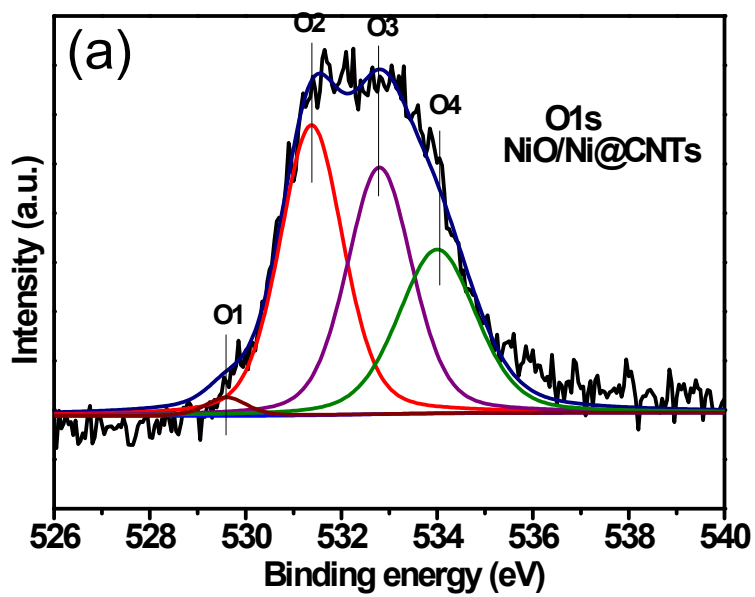

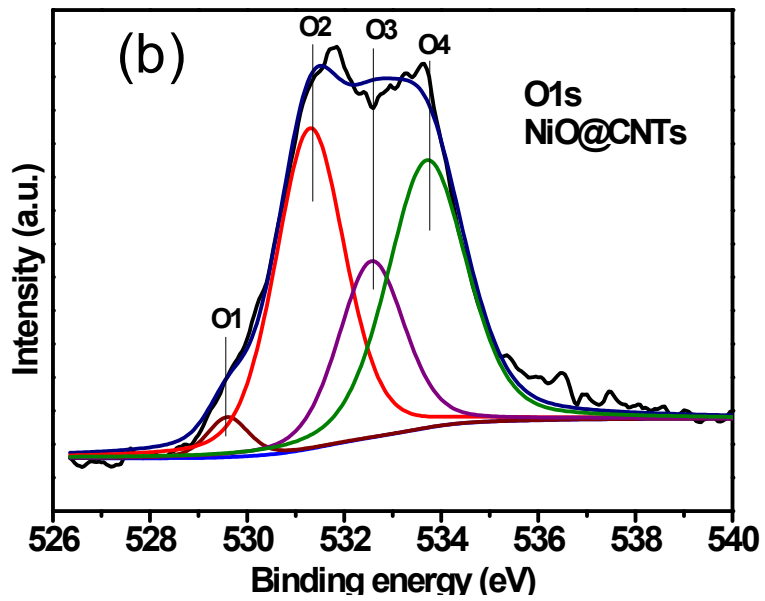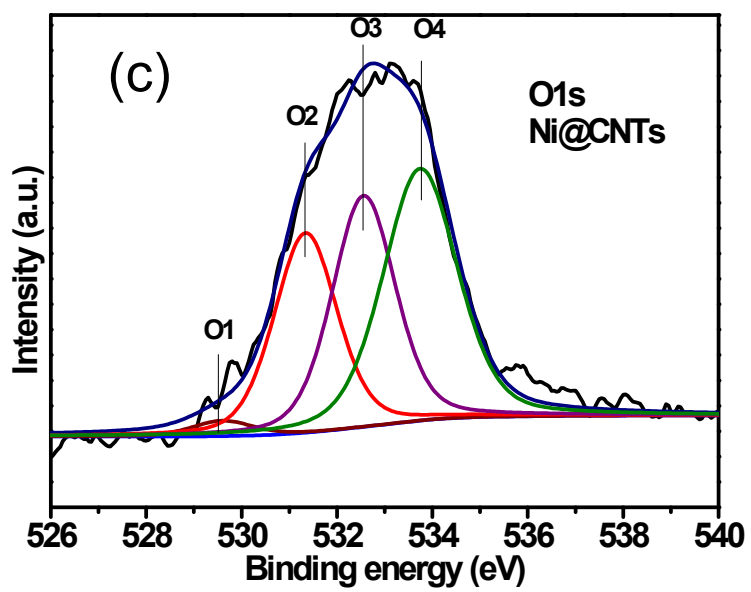

Figure S3. XPS O1s profile of NiO/Ni@CNTs (a), NiO@CNTs(b) and Ni@CNTs(c).

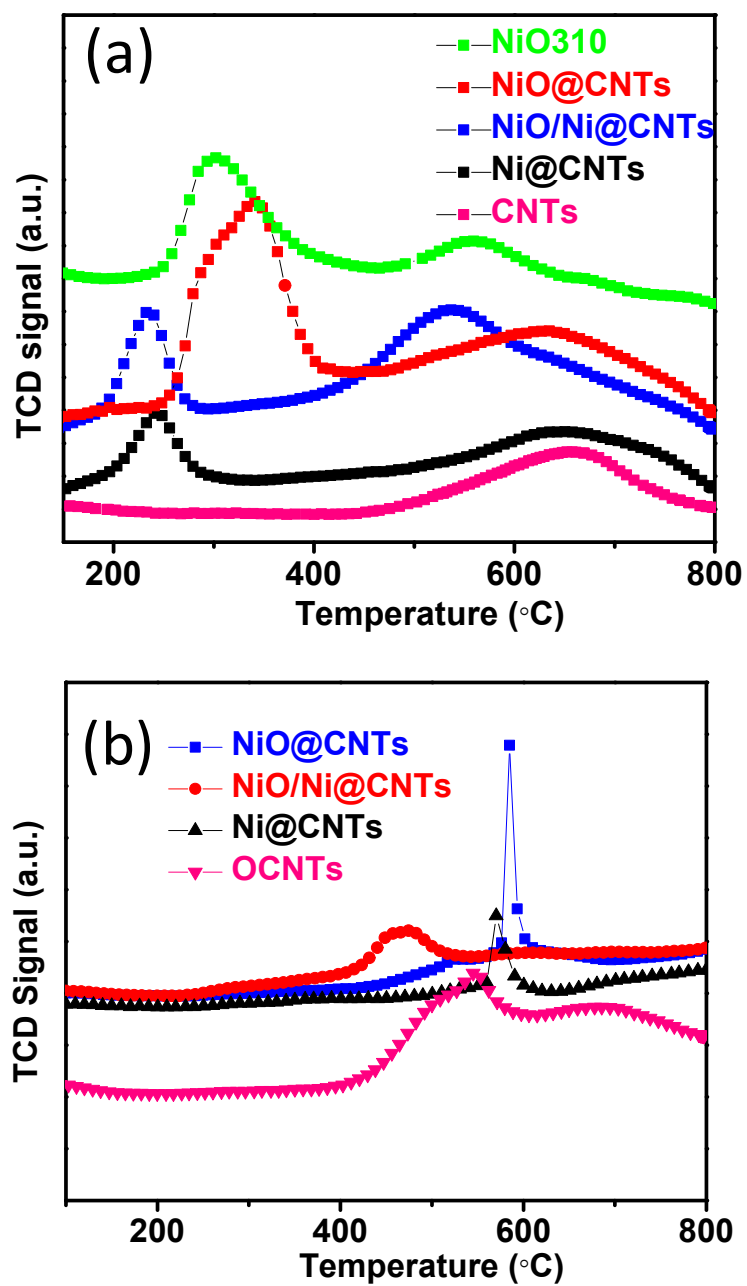

**Figure S4.** H<sub>2</sub>-TPR profiles (a) and CO<sub>2</sub>-TPD profiles (b) of the catalysts.

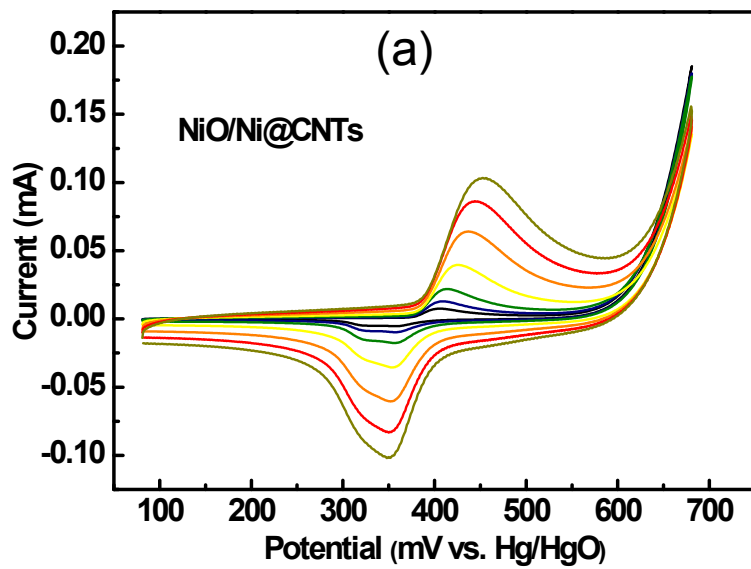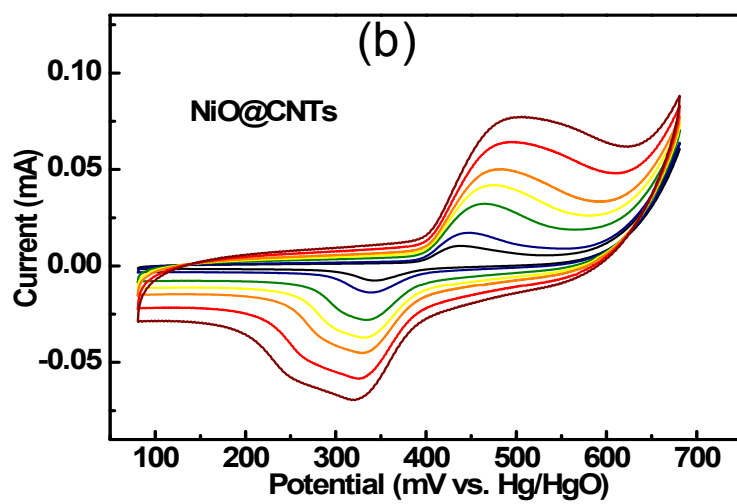

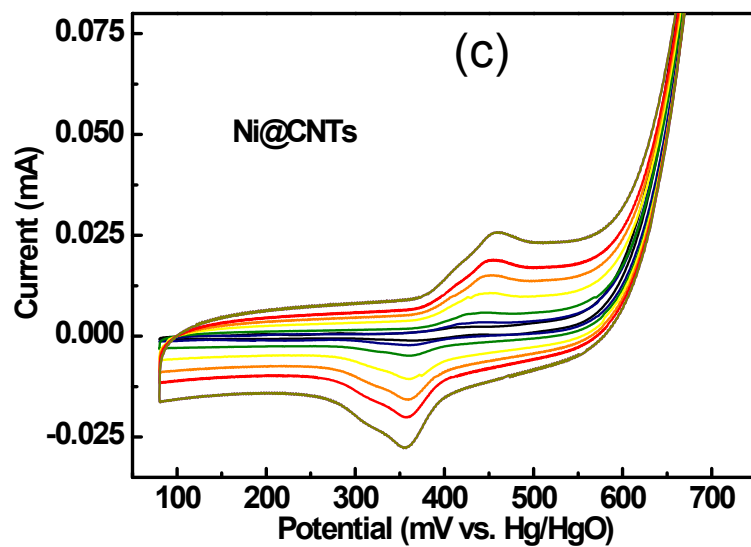

**Figure S5.** Cyclic voltammograms (CV) of NiO/Ni@CNTs (a), NiO@CNTs (b) and Ni@CNTs (c) in 1M KOH. Scan rate: 5, 10, 20, 50, 100, 150, 200  $\text{mV s}^{-1}$ .

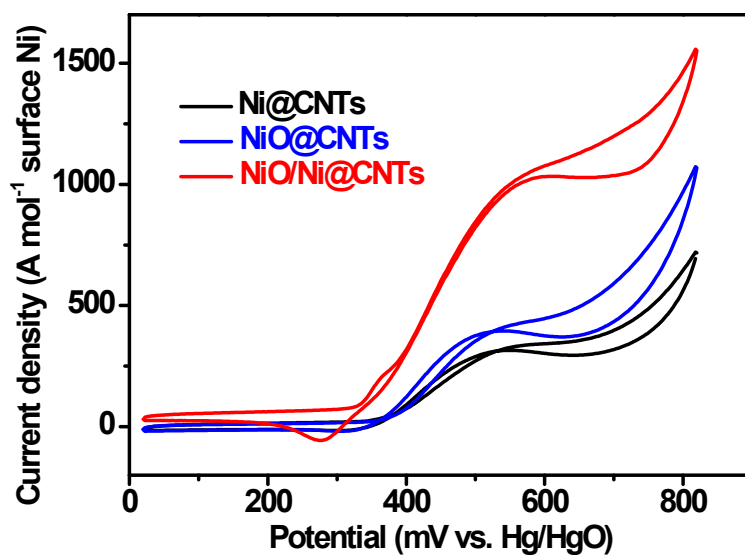

**Figure S6.** CVs of catalysts normalized to the surface Ni content in 1M KOH+0.5 M  $\text{CH}_3\text{OH}$ . Scan rate: 50  $\text{mV s}^{-1}$ .



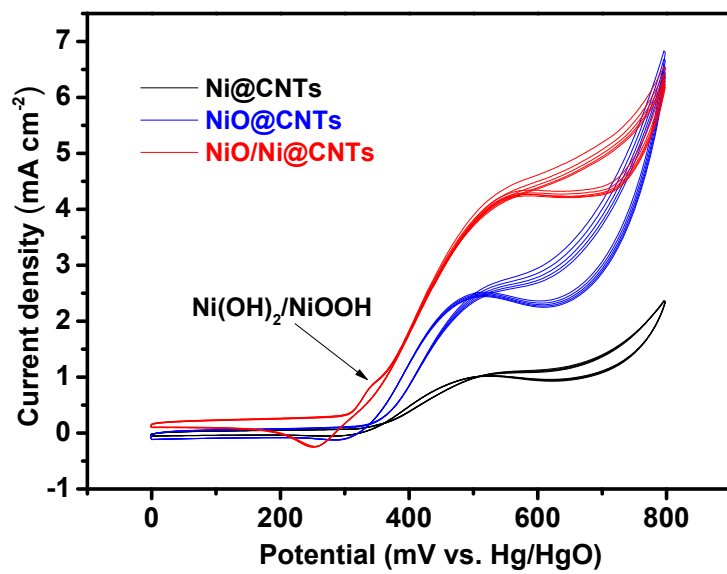

Figure S7. CVs of catalysts in the first five cycles.

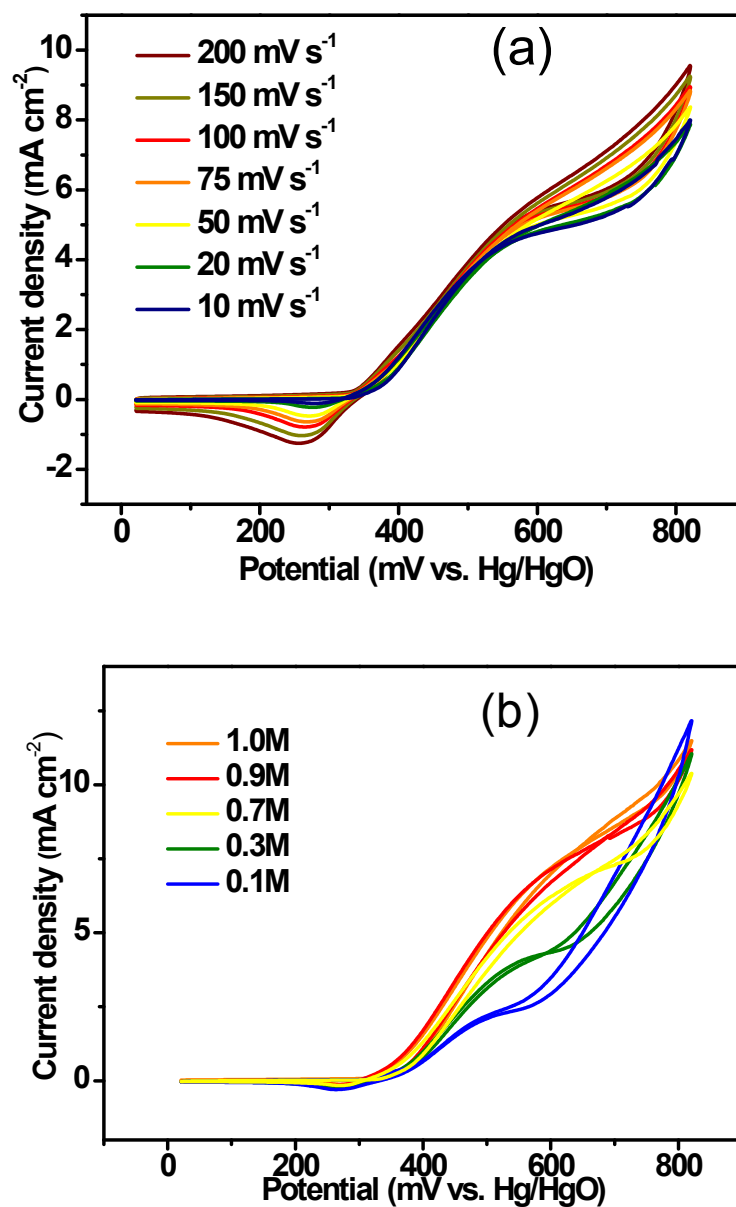

**Figure S8.** Current response of methanol oxidation of NiO/Ni@CNTs with the increasing scan rates in 1.0 M KOH+0.5 M methanol (a). Scan rate: 10, 20, 50, 100, 150, 200 mV s<sup>-1</sup>. Current response of methanol oxidation of NiO/Ni@CNTs with the increasing concentration of methanol (b). Scan rate: 20 mV s<sup>-1</sup>.

**Table S1.** Structural parameters of various samples.

| <b>sample</b> | <b>content<br/>(wt%)<sup>a)</sup></b> | <b>dispersion<br/>(%)<sup>b)</sup></b> | <b>surface<br/>content<br/>(mmol<br/>g<sup>-1</sup> cat)<sup>b)</sup></b> | <b>surface<br/>area<br/>(m<sup>2</sup>g<sup>-1</sup><br/>cat)<sup>b)</sup></b> | <b>Particle<br/>size<br/>TEM<br/>(nm)</b> | <b>Particle<br/>size<br/>XRD<br/>(nm)</b> |
|---------------|---------------------------------------|----------------------------------------|---------------------------------------------------------------------------|--------------------------------------------------------------------------------|-------------------------------------------|-------------------------------------------|
| Ni@CNTs       | 3.26                                  | 4.21                                   | 0.023                                                                     | 0.9141                                                                         | 9.17                                      | 9.4                                       |
| NiO@CNTs      | 3.76                                  | 4.50                                   | 0.045                                                                     | 1.1277                                                                         | 4.1                                       | 4.0                                       |
| NiO/Ni@CNTs   | 3.98                                  | 4.38                                   | 0.0297                                                                    | 1.1616                                                                         | 7.93                                      | 8.0                                       |

<sup>a)</sup> values determined by ICP–AES. <sup>b)</sup> values calculated based on pulse chemisorption analysis.

**Table S2.** Comparison of activity between catalysts in this study and reported Ni based catalysts.

| Catalysts                | Mass Activity<br>(mA mg <sup>-1</sup> ) | Testing Conditions                     |                                  | References |
|--------------------------|-----------------------------------------|----------------------------------------|----------------------------------|------------|
|                          |                                         | Scanning rate<br>(mV s <sup>-1</sup> ) | CH <sub>3</sub> OH concentration |            |
| NiO/Ni@CNTs              | 2094                                    | 50                                     | 1.0 M CH <sub>3</sub> OH         | This work  |
| NiO @CNTs                | 1328                                    | 50                                     | 1.0 M CH <sub>3</sub> OH         | This work  |
| Ni@CNTs                  | 966                                     | 50                                     | 1.0 M CH <sub>3</sub> OH         | This work  |
| NiP                      | 1490                                    | 50                                     | 1.0 M CH <sub>3</sub> OH         | [1]        |
| CNT–Ni/SiC-700           | 1000                                    | 50                                     | 1.0 M CH <sub>3</sub> OH         | [2]        |
| NiO                      | 84                                      | 20                                     | 0.1M CH <sub>3</sub> OH          | [3]        |
| NiO/CNTs                 | 1900                                    | 50                                     | 0.5 M CH <sub>3</sub> OH         | [4]        |
| NiO/N-CNFs               | 1800                                    | 50                                     | 1.0 M CH <sub>3</sub> OH         | [5]        |
| Ni–P/RGO                 | 117                                     | 10                                     | 0.5 M CH <sub>3</sub> OH         | [6]        |
| Ni-P                     | 60                                      | 10                                     | 0.5 M CH <sub>3</sub> OH         | [6]        |
| Ni-DES                   | 3                                       | 10                                     | 0.1M CH <sub>3</sub> OH          | [7]        |
| Ni(OH) <sub>2</sub> /BDD | 600                                     | 5                                      | 0.47 M CH <sub>3</sub> OH        | [8]        |

### References

1. Tong, Y. Y.; Gu, C. D.; Zhang, J. L.; Huang, M. L.; Tang, H.; Wang, X. L.; Tu, J. P. *J. Mater. Chem. A* **2015**, *3*, 4669-4678.
2. Xie, S.; Tong, X. L.; Jin, G. Q.; Qin, Y.; Guo, X. Y. *J. Mater. Chem. A* **2013**, *1*, 2104-2109.
3. Spinner, N.; Mustain, W. E. *Electrochim. Acta*. **2011**, *56*, 5656-5666.
4. Tong, X. L.; Qin, Y.; Guo, X. Y.; Moutanabbir, O.; Ao, X. Y.; Pippel, E.; Zhang, M. Knez, L. B. *Small* **2012**, *8*, 3390-3395.
5. Al-Enizi, A. M.; Ghanem, M. A.; El-Zatahry, A. A.; Al-Deyab, S. S. *Electrochim. Acta*. **2014**, *137*, 774-780.
6. Zhang, H.; Gu, C. D.; Huang, M. L.; Wang, X. L.; Tu, J. P. *Electrochem. Commun.* **2013**, *35*, 108-111.
7. Gu, C. D.; Huang, M. L.; Ge, X.; Zheng, H.; Wang, X. L.; Tu, J. P. *Int. J. Hydrogen Energy* **2014**, *39*, 10892-10901.
8. Hutton, L. A.; Vidotti, M.; Patel, A. N.; Newton, M. E.; Uniwin, P. R.; Macpherson, J. V. *J. Phys. Chem. C* **2010**, *115*, 1649-1658.
